# Supplementary material for: Digital Leadership from the Perspective of Dynamic Capabilities: The Effect on Sustainable Performance and Resilience through Agility
Source: Research Square preprint supplement (doi:10.21203/rs.3.rs-8045805/v1), 2025-11-13
Supplement: Supplementary file 1 [file 39c7177d5306253173c8b003.docx]

| **Variables** | **Mean** | **SD** | **Skewness** | **Kurtosis** | **1** | **2** | **3** | **4** |
| --- | --- | --- | --- | --- | --- | --- | --- | --- |
| **DL** | 2.66 | 1.01 | .492 | -.423 | (.786) |  |  |  |
| **OA** | 2.67 | .80 | .438 | -.259 | .718 | (.818) |  |  |
| **OR** | 2.56 | .75 | .497 | .251 | .708 | .727 | (.792) |  |
| **SP** | 2.03 | .51 | .259 | -.176 | .141 | .250 | .234 | (.784) |

Note. SD = Standart Deviation; The values in parentheses represent the square root of the Average Variance Extracted (AVE) of the variable
