# Supplementary material for: Digital Leadership from the Perspective of Dynamic Capabilities: The Effect on Sustainable Performance and Resilience through Agility
Source: Research Square preprint supplement (doi:10.21203/rs.3.rs-8045805/v1), 2025-11-13
Supplement: Supplementary file 2 [file 3c499394665264c71f2a8217.docx]

| **Variables** |  | **Factor Loadings** | **CR** | **AVE** | **α** |
| --- | --- | --- | --- | --- | --- |
| **Digital Leadership** | DL1 | .796 | .906 | .618 | .95 |
|  | DL2 | .809 |  |  |  |
|  | DL3 | .803 |  |  |  |
|  | DL4 | .782 |  |  |  |
|  | DL5 | .766 |  |  |  |
|  | DL6 | .761 |  |  |  |
| **Organizational Agility** | OA1 | .789 | .970 | .670 | .94 |
|  | OA2 | .802 |  |  |  |
|  | OA3 | .843 |  |  |  |
|  | OA4 | .787 |  |  |  |
|  | 0A5 | .892 |  |  |  |
|  | OA6 | .825 |  |  |  |
|  | OA7 | .912 |  |  |  |
|  | OA8 | .789 |  |  |  |
|  | OA9 | .821 |  |  |  |
|  | OA10 | .779 |  |  |  |
|  | OA11 | .788 |  |  |  |
|  | OA12 | .789 |  |  |  |
|  | OA13 | .824 |  |  |  |
|  | OA14 | .828 |  |  |  |
|  | OA15 | .796 |  |  |  |
|  | OA17 | .826 |  |  |  |
| **Organizational Resilience** | OR1 | .798 | .937 | .627 | .94 |
|  | OR2 | .786 |  |  |  |
|  | OR3 | .747 |  |  |  |
|  | OR4 | .792 |  |  |  |
|  | OR5 | .811 |  |  |  |
|  | OR6 | .794 |  |  |  |
|  | OR7 | .798 |  |  |  |
|  | OR8 | .801 |  |  |  |
|  | OR9 | .798 |  |  |  |
| **Sustainable Performance** | SP1 | .891 | .941 | .614 | .94 |
|  | SP2 | .789 |  |  |  |
|  | SP3 | .879 |  |  |  |
|  | SP4 | .766 |  |  |  |
|  | SP5 | .748 |  |  |  |
|  | SP6 | .712 |  |  |  |
|  | SP7 | .721 |  |  |  |
|  | SP8 | .752 |  |  |  |
|  | SP9 | .801 |  |  |  |
|  | SP10 | .758 |  |  |  |

Note. Item OA16, with a factor loading below .30, was removed from the analysis due to its insufficient loading.
