# Supplementary material for: Digital Leadership from the Perspective of Dynamic Capabilities: The Effect on Sustainable Performance and Resilience through Agility
Source: Research Square preprint supplement (doi:10.21203/rs.3.rs-8045805/v1), 2025-11-13
Supplement: Supplementary file 3 [file 3f00fdd33d44ebedb49896e2.docx]

| **Characteristics** |  | **Frequency** | **%** |
| --- | --- | --- | --- |
| **Gender** | Female | 214 | 68,6 |
|  | Male | 98 | 31,4 |
| **Marital Status** | Married | 170 | 54,5 |
|  | Single | 142 | 45,5 |
| **Age (Year)** | 18-25 | 19 | 6,1 |
|  | 26-30 | 59 | 18,9 |
|  | 31-35 | 79 | 25,4 |
|  | 36-40 | 68 | 21,8 |
|  | 41-45 | 46 | 14,7 |
|  | 46 and above | 41 | 13,1 |
| **Sector** | Service | 65 | 20,8 |
|  | Health | 42 | 13,5 |
|  | Education | 169 | 54,2 |
|  | Manufacturing | 10 | 3,2 |
|  | Retailing | 8 | 2,6 |
|  | Others | 18 | 5,8 |
| **Education** | High school | 5 | 1,6 |
|  | Vocational school | 13 | 4,2 |
|  | Bachelor’s | 86 | 27,6 |
|  | Master’s degree | 208 | 66,7 |

Note. N = 312
