# Supplementary material for: Digital Leadership from the Perspective of Dynamic Capabilities: The Effect on Sustainable Performance and Resilience through Agility
Source: Research Square preprint supplement (doi:10.21203/rs.3.rs-8045805/v1), 2025-11-13
Supplement: Supplementary file 4 [file 95f7b0325d0814296d8840cf.docx]

| **Variables** | **OA (M)** | | | | **OR(Y1)** | | | | **SP (Y2)** | | | |
| --- | --- | --- | --- | --- | --- | --- | --- | --- | --- | --- | --- | --- |
| **Β** | **SE** | **LLCI** | **ULCI** | **β** | **SE** | **LLCI** | **ULCI** | **β** | **SE** | **LLCI** | **ULCI** |
| **DL (X)** | .719 | .030 | .659 | .771 | .234 | .032 | .147 | .328 | .277 | .040 | .235 | .179 |
| **OA (M)** |  |  |  |  | .659 | .055 | .565 | .741 | .303 | .053 | .155 | .445 |
| **R2** | .23 | | | | .74 | | | | .72 | | | |
| **Bootstrap Indirect Effects** | Digital Leadership → Organizational Agility→ Organizational Resilience  β =.474, 95% CI [.388, .549], p=.001 | | | | | | | | | | | |
| Digital Leadership → Organizational Agility→ Sustainable Performance  β =.218, 95% CI [.156, .303], p=.001 | | | | | | | | | | | |

Note. p< .01; p< .001; SE = Standart error; β = Standardized coefficients; CI = Confidence Interval; ULCI = Upper Level Confidence Interval; LLCI = Lower Level Confidence Interval.
