# Supplementary material for: Digital Leadership from the Perspective of Dynamic Capabilities: The Effect on Sustainable Performance and Resilience through Agility
Source: Research Square preprint supplement (doi:10.21203/rs.3.rs-8045805/v1), 2025-11-13
Supplement: Supplementary file 5 [file 96c2f1a4853476b1ebc4a72e.docx]

| **Paths** | | | | | **B** | **SE** | **LLCI** | **ULCI** |
| --- | --- | --- | --- | --- | --- | --- | --- | --- |
| DL | → | OA |  |  | .542 | .030 | .476 | .601 |
| DL | → | OR |  |  | .179 | .032 | .107 | .246 |
| OA | → | OR |  |  | .657 | .043 | .550 | .736 |
| OA | → | SP |  |  | .209 | .053 | .105 | .309 |
| DL | → | SP |  |  | .351 | .42 | .120 | .140 |
| DL | → | OA | → | OR | .399 | .038 | .288 | .414 |
| DL | → | OA | → | SP | .113 | .055 | .056 | .169 |

Note. p<.001; B = Unstandardized coefficents.
