# Supplementary material for: Digital Leadership from the Perspective of Dynamic Capabilities: The Effect on Sustainable Performance and Resilience through Agility
Source: Research Square preprint supplement (doi:10.21203/rs.3.rs-8045805/v1), 2025-11-13
Supplement: Supplementary file 6 [file a6fa879a63f5f4b15f9569ab.docx]

| **Variables** | **x2/df** | **NFI** | **CFI** | **AGFI** | **GFI** | **RMSEA** | **IFI** | **CFI** | **TLI** |
| --- | --- | --- | --- | --- | --- | --- | --- | --- | --- |
| **DL** | 2.65 | .99 | .99 | .94 | .98 | .73 | .99 | .99 | .98 |
| **OA** | 2,86 | .90 | .90 | .96 | .91 | .077 | .93 | .94 | .94 |
| **OR** | 4,57 | .97 | .99 | .96 | .98 | .072 | .98 | .98 | .96 |
| **SP** | 2,97 | .95 | .96 | .90 | .94 | .80 | .96 | .95 | .95 |

Note. DL = Digital Leadership; OA = Organizational Agility; OR = Organizational Resilience; SP = Sustainable Performance
